# Supplementary material for: Bowman‒Birk Inhibitor Suppresses Herpes Simplex Virus Type 2 Infection of Human Cervical Epithelial Cells
Source: MDPI journal article supplement (doi:10.3390/v10100557), 2018-10-12
Supplement: s1 [file s1]

## Supplementary Materials

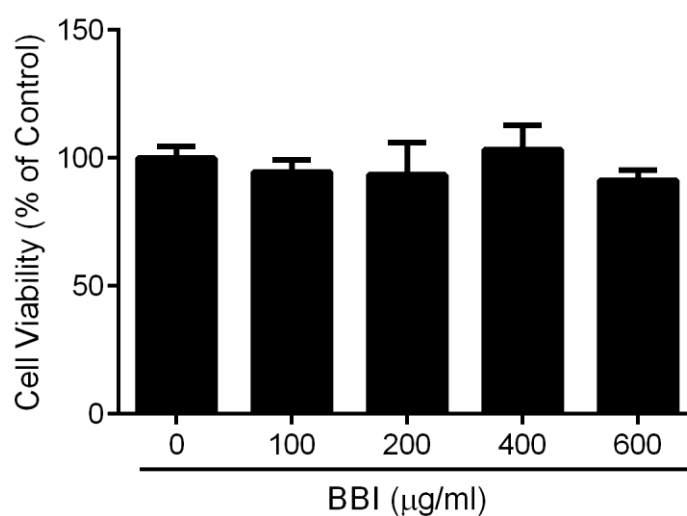

**Figure S1.** The cytotoxic effect of BBI on End1/E6E7 cells. End1/E6E7 cells were placed in a 96-well plate and cultured in the presence of BBI at the indicated concentrations for 96 h. Cell viability was measured by MTT assay. Data shown were the mean  $\pm$  SD from three independent experiments.
